# Supplementary material for: PM 2.5 pollution in a megacity of southwest China: source apportionment and implication
Source: Copernicus journal article supplement (doi:10.5194/acp-14-8679-2014), 2014-08-26
Supplement: Supplementary file [file acp-14-8679-2014-supplement.pdf]

Supplement of Atmos. Chem. Phys., 14, 8679–8699, 2014  
<http://www.atmos-chem-phys.net/14/8679/2014/>  
doi:10.5194/acp-14-8679-2014-supplement  
© Author(s) 2014. CC Attribution 3.0 License.

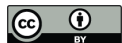

Atmospheric  
Chemistry  
and Physics  
Open Access

The logo for Atmospheric Chemistry and Physics, featuring a stylized globe with a grid pattern and a vertical line through it, enclosed in a circle.

*Supplement of*

## **PM<sub>2.5</sub> pollution in a megacity of southwest China: source apportionment and implication**

**J. Tao et al.**

*Correspondence to:* S.-C. Hsu (schsu815@rcec.sinica.edu.tw) and J. Gao (gaojian@craes.org.cn)

Supplementary Figures:

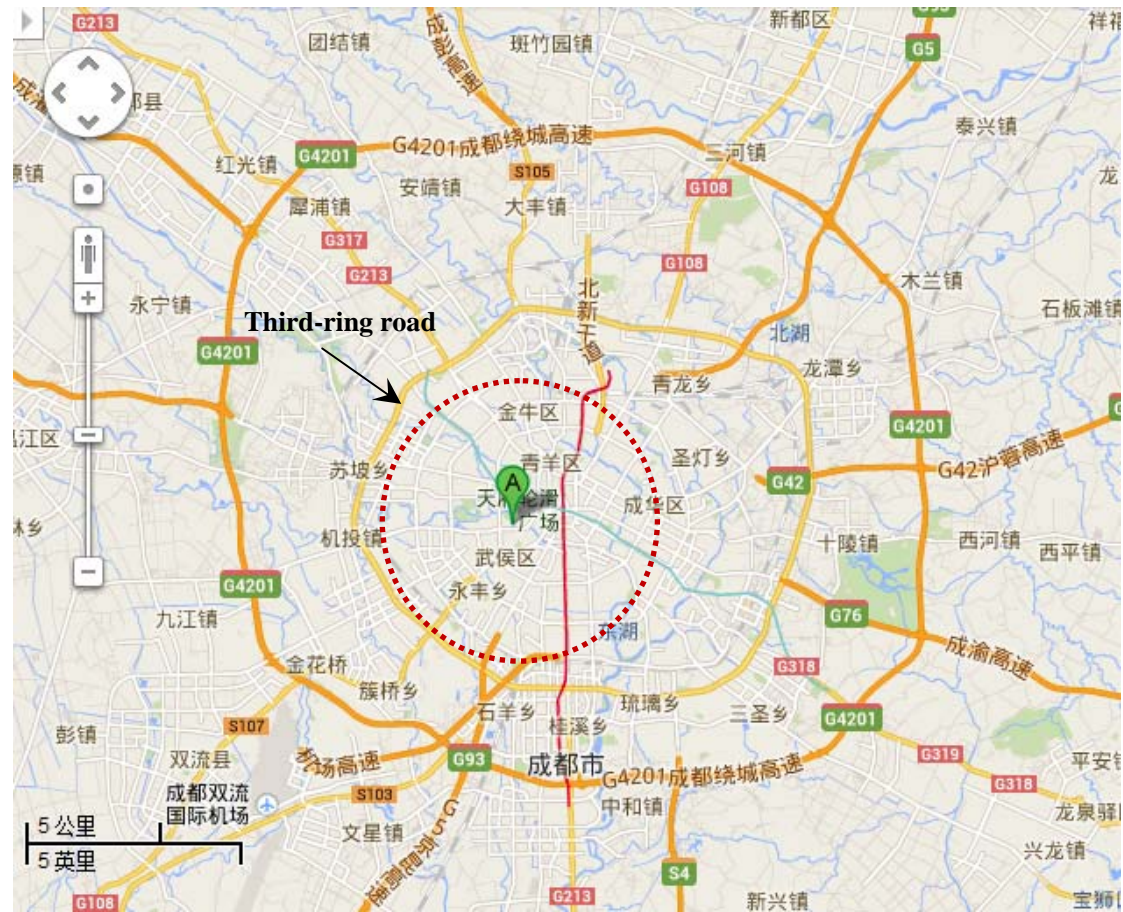

Fig. S1. Sampling location (30.65°N, 104.03°E) in Chengdu on a local map. The radius of red dotted circle is 5km and the centre point is CRAES.

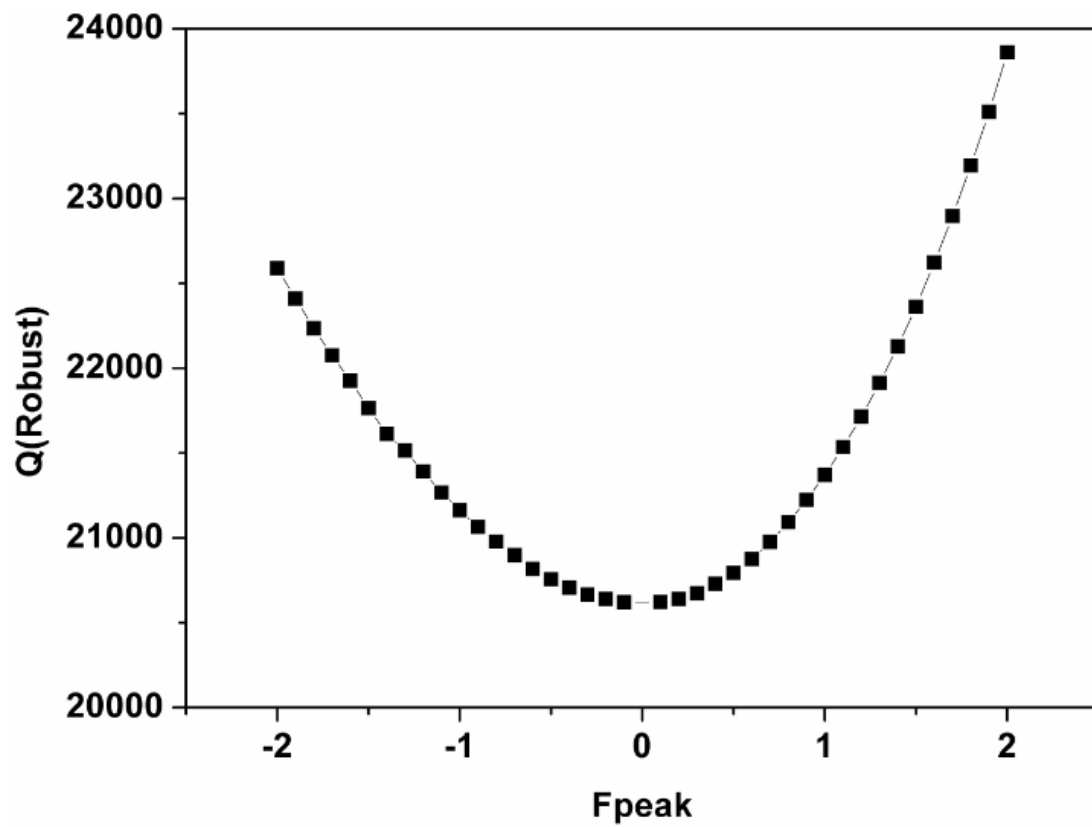

Fig. S2. Plot of Q as a function of Fpeak for PM<sub>2.5</sub> data set in Chengdu.

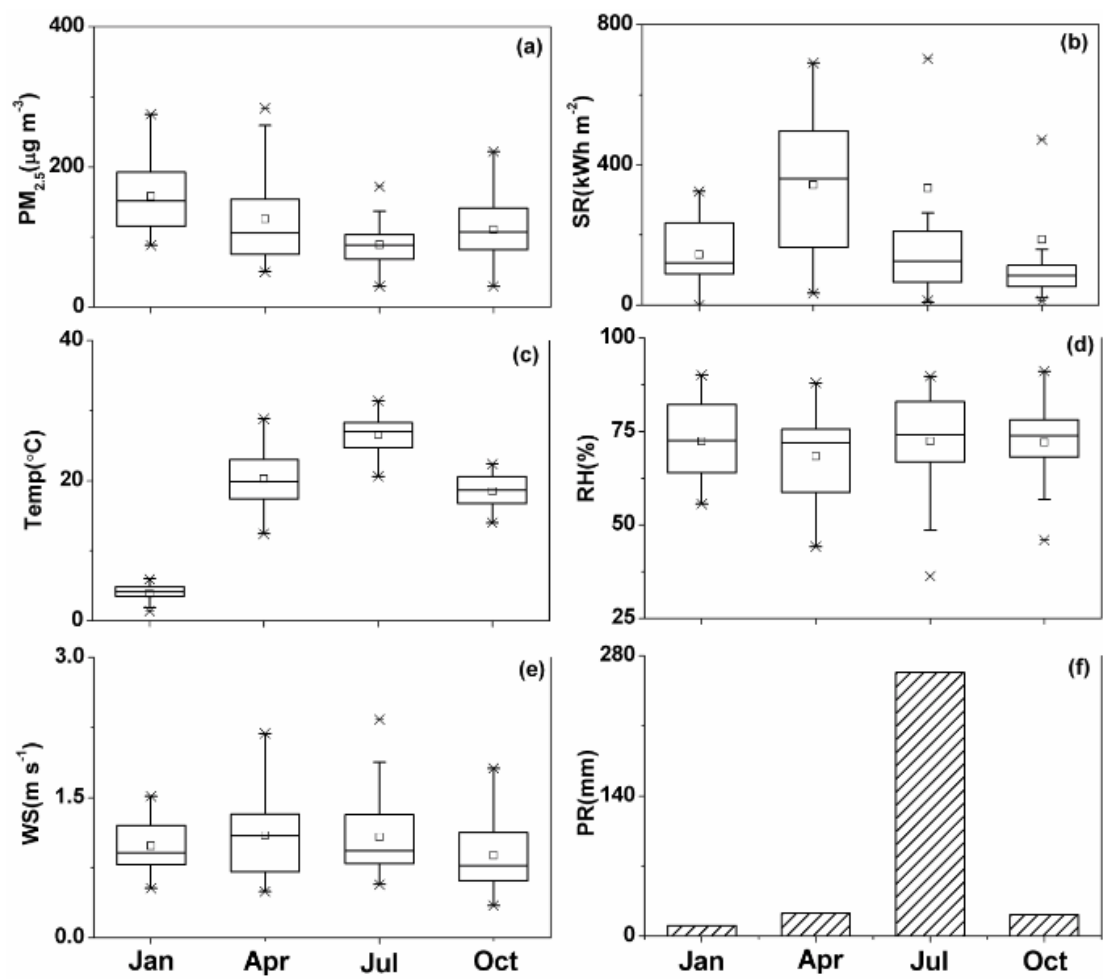

Fig. S3. Seasonally average of (a)  $PM_{2.5}$ , (b) SR (solar radiation), (c) Temp (temperature), (d) RH (relative humidity), (e) WS (wind speed), and (f) PR (precipitation). A normal distribution is fitted to the measurements within each bin and minimum, 1st, 25th, 50th, 75th, 99th and maximum percentiles.

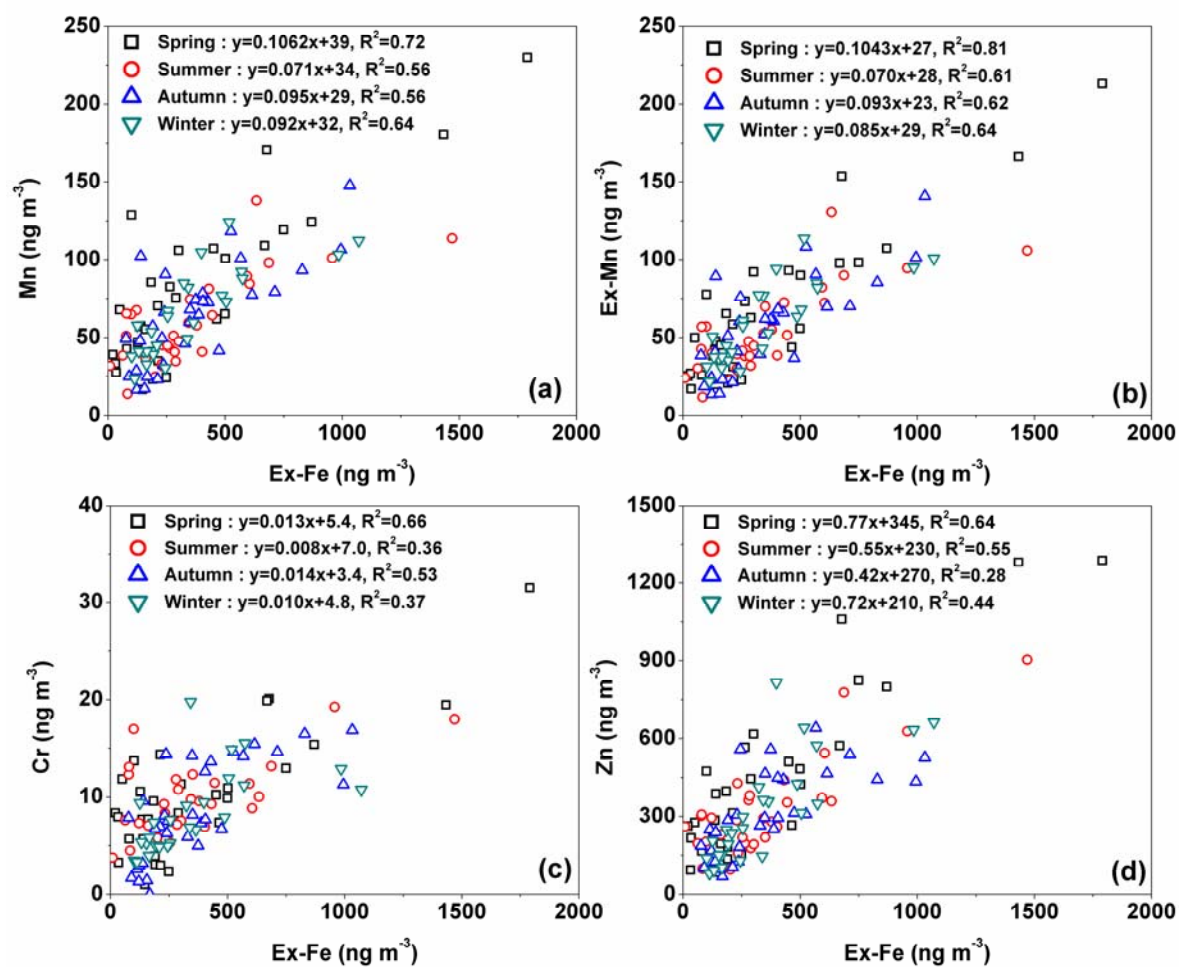

Fig. S4. Correlations of Mn, Ex-Mn, Cr, and Zn versus Ex-Fe, of which the definitions of Ex-Fe and Ex-Mn can be found in text.
